# Supplementary material for: Ursolic Acid Ameliorates Myocardial Ischaemia/Reperfusion Injury by Improving Mitochondrial Function via Immunoproteasome-PP2A-AMPK Signalling
Source: MDPI journal article supplement (doi:10.3390/nu15041049), 2023-02-20
Supplement: s1 [file s1]

## Supplementary Materials

**Supplementary Table S1.** Echocardiographic measurement of wild type (WT) mice with Ursolic acid injection subjected to I/R model for 24 hours.

| Parameter  | Vehicle Sham   | UA Sham        | Vehicle I/R      | UA I/R                      |
|------------|----------------|----------------|------------------|-----------------------------|
| EF(%)      | 69.43±1.542    | 69.88±1.252    | 26.36±0.9466**   | 37.14±2.397##               |
| FS(%)      | 38.03±1.264    | 38.33±0.9937   | 12.08±0.4788**   | 17.58±1.291##               |
| LVID;d(mm) | 3.246±0.1467   | 3.214±0.01582  | 4.208±0.04445**  | 3.795±0.09054 <sup>#</sup>  |
| LVID;s(mm) | 2.012±0.06047  | 1.982±0.03245  | 3.700±0.03834**  | 3.129±0.09987 <sup>#</sup>  |
| LVPW;d(mm) | 1.031±0.08078  | 0.9504±0.09043 | 0.6283±0.03676** | 0.9504±0.1273 <sup>#</sup>  |
| LVPW;s(mm) | 1.376±0.1143   | 1.257±0.04870  | 0.8607±0.05011** | 1.232±0.1352 <sup>#</sup>   |
| LVAW;d(mm) | 0.9628±0.02222 | 0.9892±0.06842 | 0.6195±0.05865** | 0.8448±0.07377 <sup>#</sup> |
| LVAW;s(mm) | 1.417±0.05119  | 1.397±0.07854  | 0.6935±0.1075*   | 1.031±0.07584 <sup>#</sup>  |

Values are mean ± SEM, *n* = 6 per group. EF, ejection fraction; FS, fraction shortening; left ventricular mass; LVID, left ventricular internal diameter; LVPW, left ventricular posterior wall; LVAW, left ventricular anterior wall. \**p* < 0.05, \*\**p* < 0.01 versus Vehicle+sham; <sup>#</sup>*p* < 0.05, ##*p* < 0.01 versus Vehicle+I/R.

**Supplementary Table S2. List of primary antibodies used in immunoblotting analysis.**

| Primary antibodies name          | Company                    | Article Number |
|----------------------------------|----------------------------|----------------|
| $\beta$ 1i                       | Abcam                      | ab242061       |
| $\beta$ 2i                       | Abcam                      | ab183506       |
| $\beta$ 5i                       | Abcam                      | ab3329         |
| PP2A                             | Abcam                      | ab32056        |
| AMPK $\alpha$                    | Cell Signalling Technology | 5831S          |
| Phosphorylated (p)-AMPK $\alpha$ | Cell Signalling Technology | 2535T          |
| PGC1 $\alpha$                    | Proteintech                | 66369-AP       |
| Drp1                             | Cell Signalling Technology | 5391S          |
| Mfn1                             | Proteintech                | 13798-1-AP     |
| Mfn2                             | Proteintech                | 12186-1-AP     |
| Ubiquitin                        | Proteintech                | 10201-2-AP     |
